# Supplementary material
Source: HighWire-hosted journal article supplement (https://erj.ersjournals.com/content/51/1/1701214)

Fig. S7

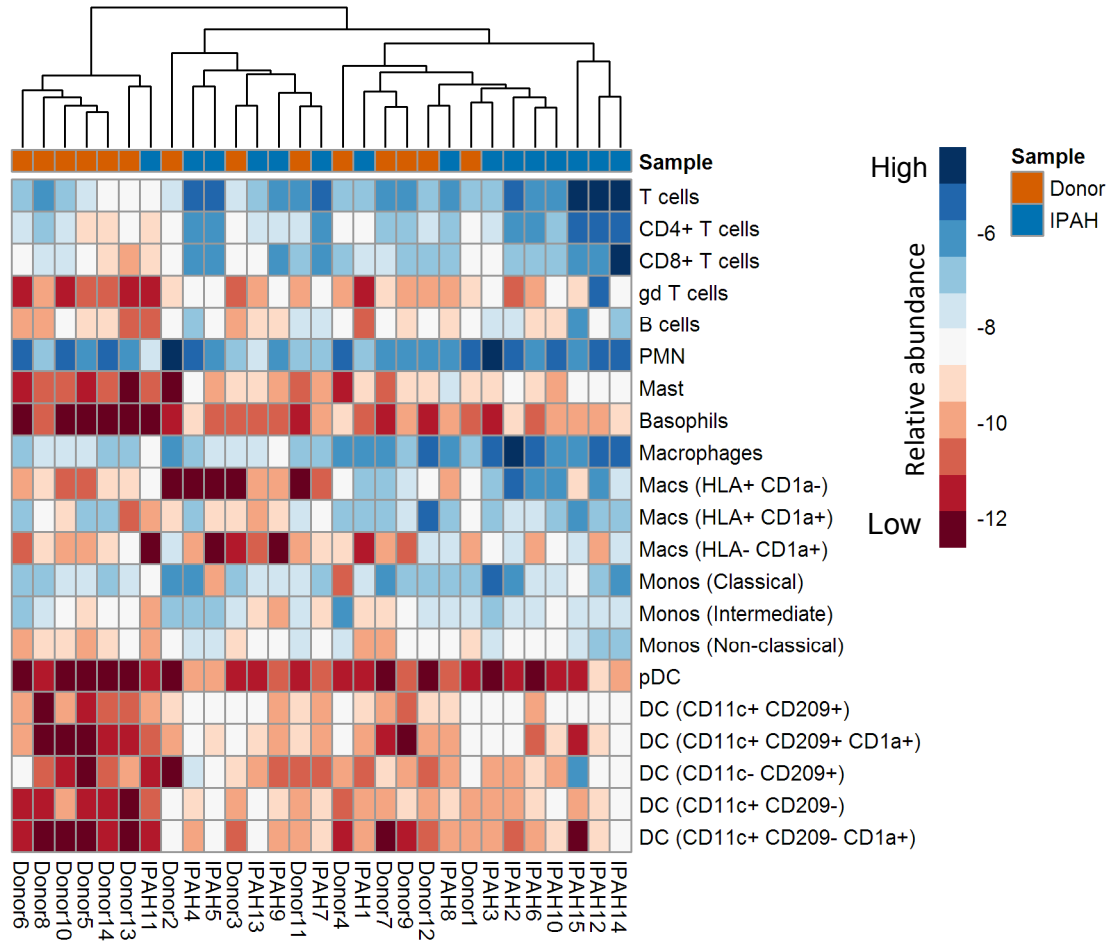

Supplement: inline-supplementary-material-8 [file inline-supplementary-material-8.pdf]
