# Supplementary material
Source: HighWire-hosted journal article supplement (https://erj.ersjournals.com/content/51/1/1701214)

**Fig. S8**

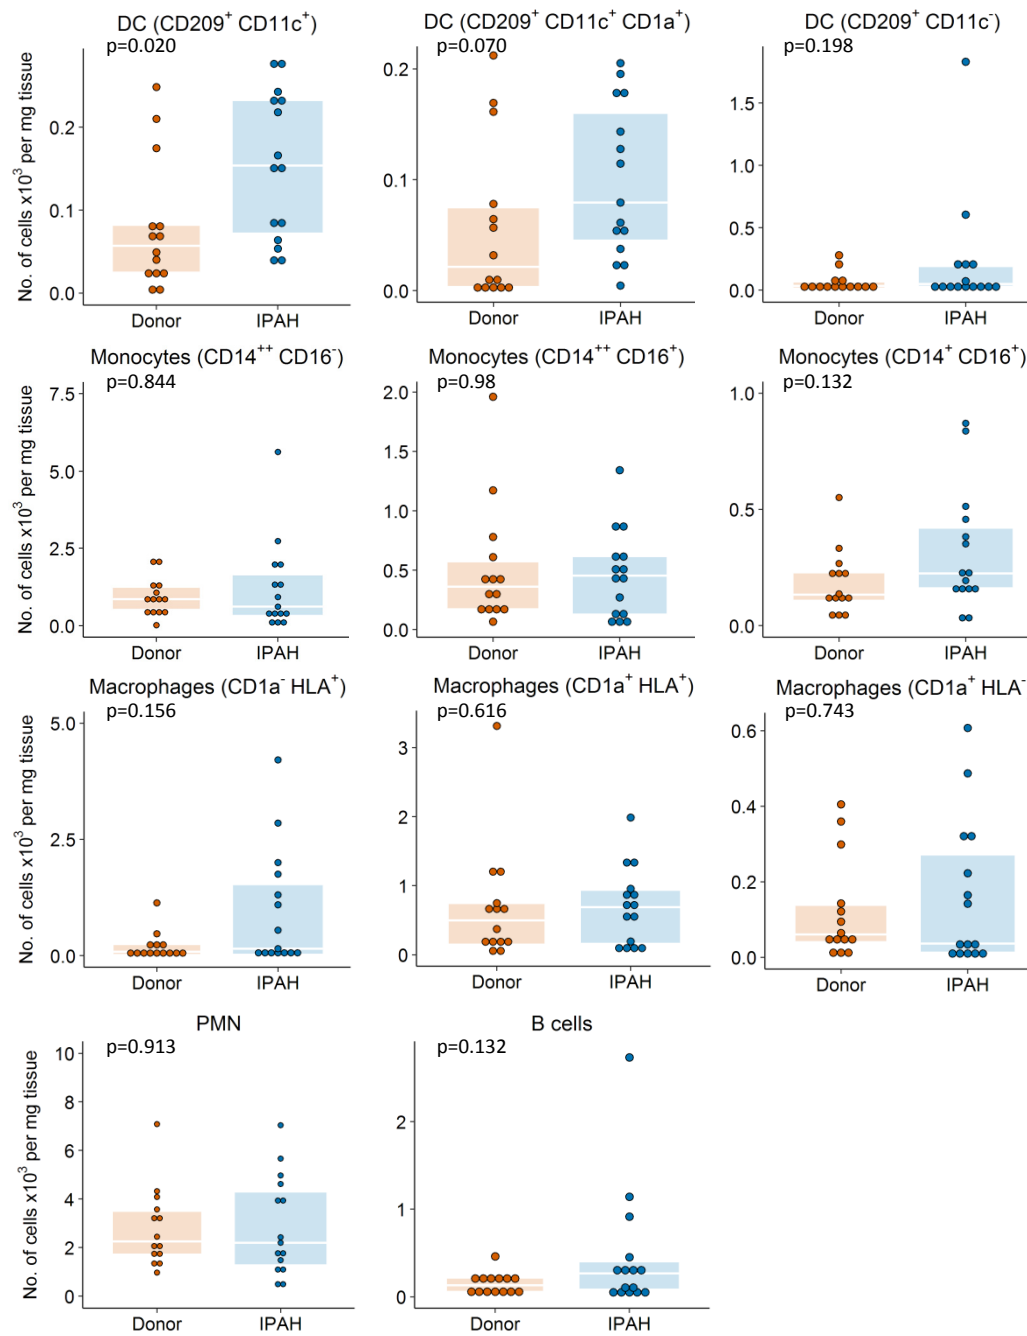

Supplement: inline-supplementary-material-9 [file inline-supplementary-material-9.pdf]
