# Supplementary material
Source: HighWire-hosted journal article supplement (https://erj.ersjournals.com/content/51/1/1701214)

Fig. S9

A

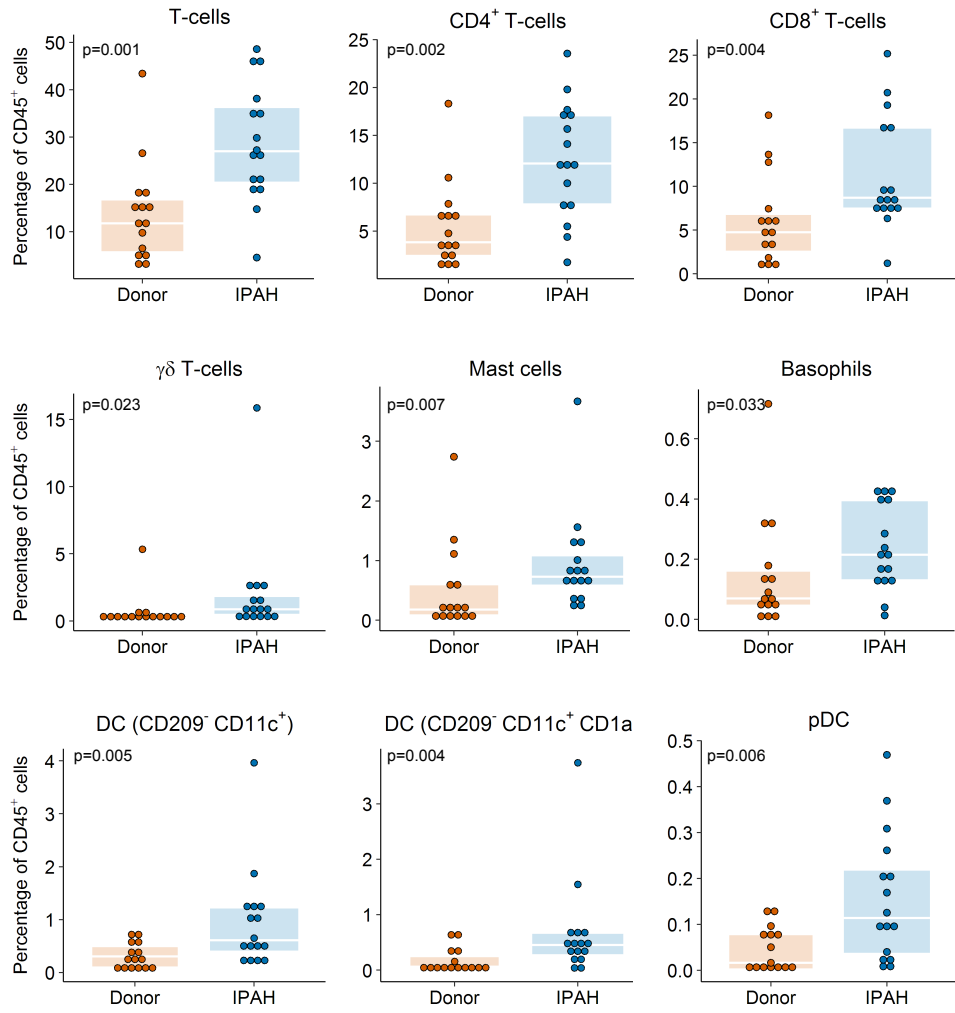

B

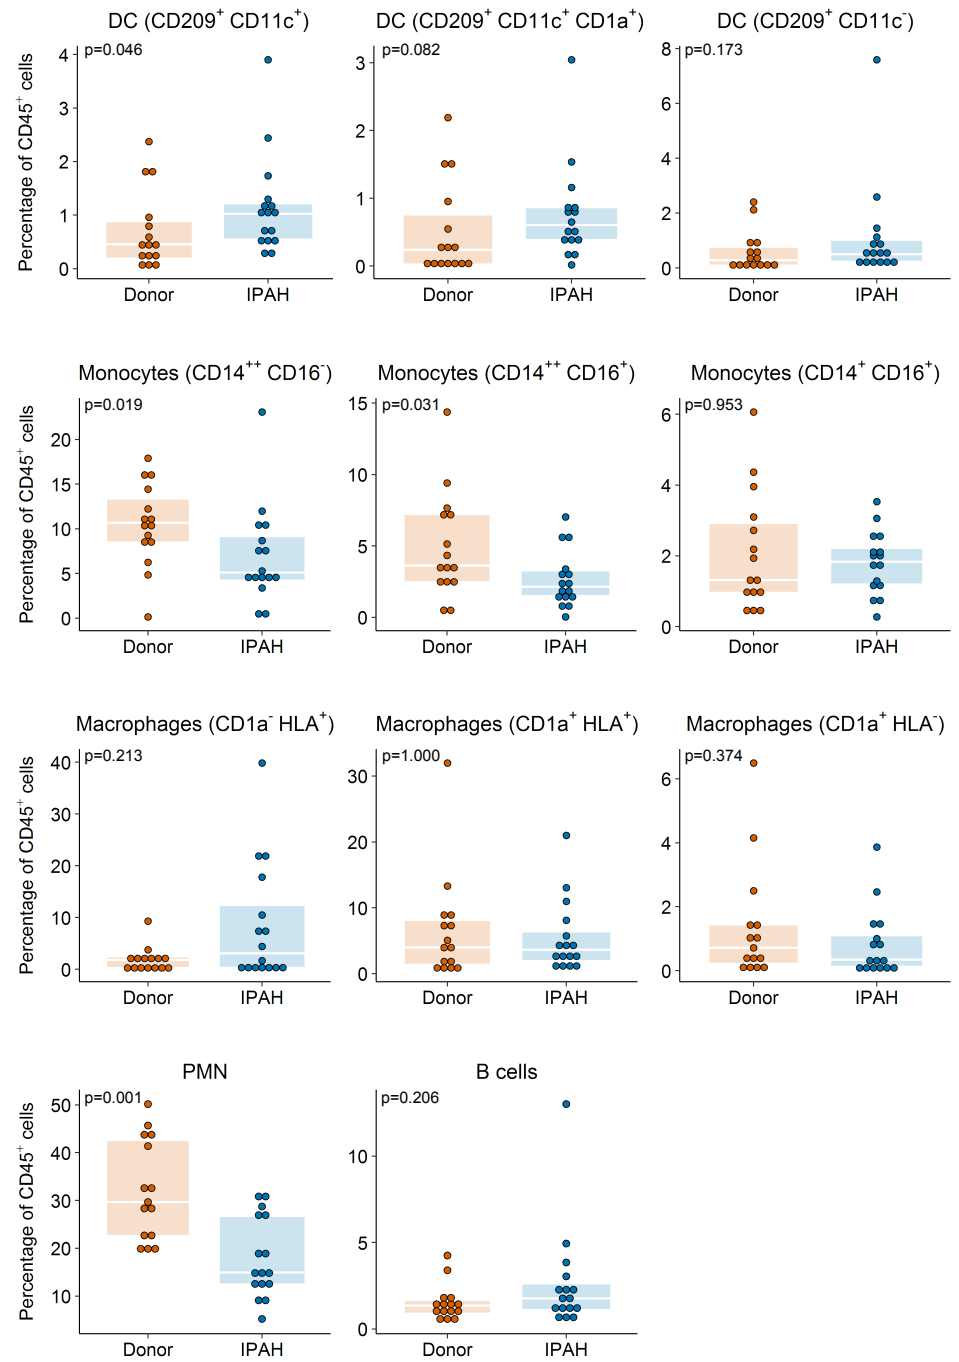

Supplement: inline-supplementary-material-10 [file inline-supplementary-material-10.pdf]
