# Supplementary material
Source: HighWire-hosted journal article supplement (https://erj.ersjournals.com/content/51/1/1701214)

Fig. S1

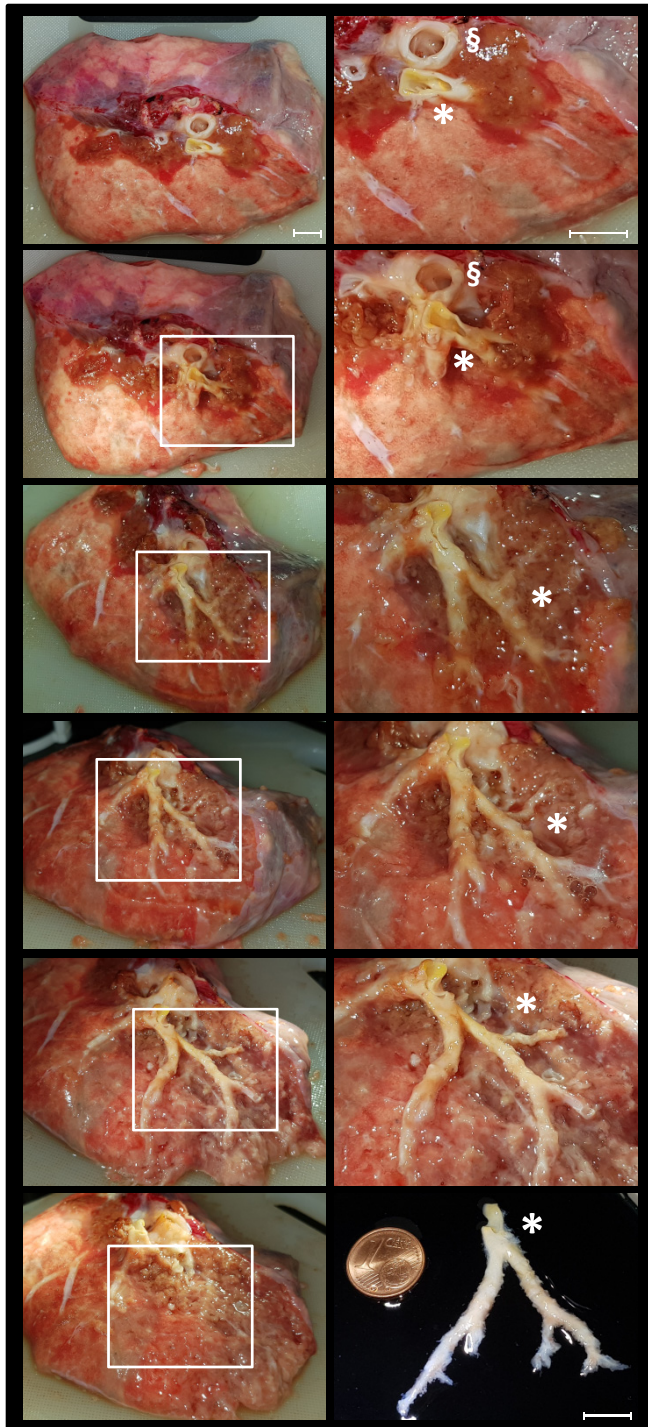

Supplement: inline-supplementary-material-2 [file inline-supplementary-material-2.pdf]

Fig. S4

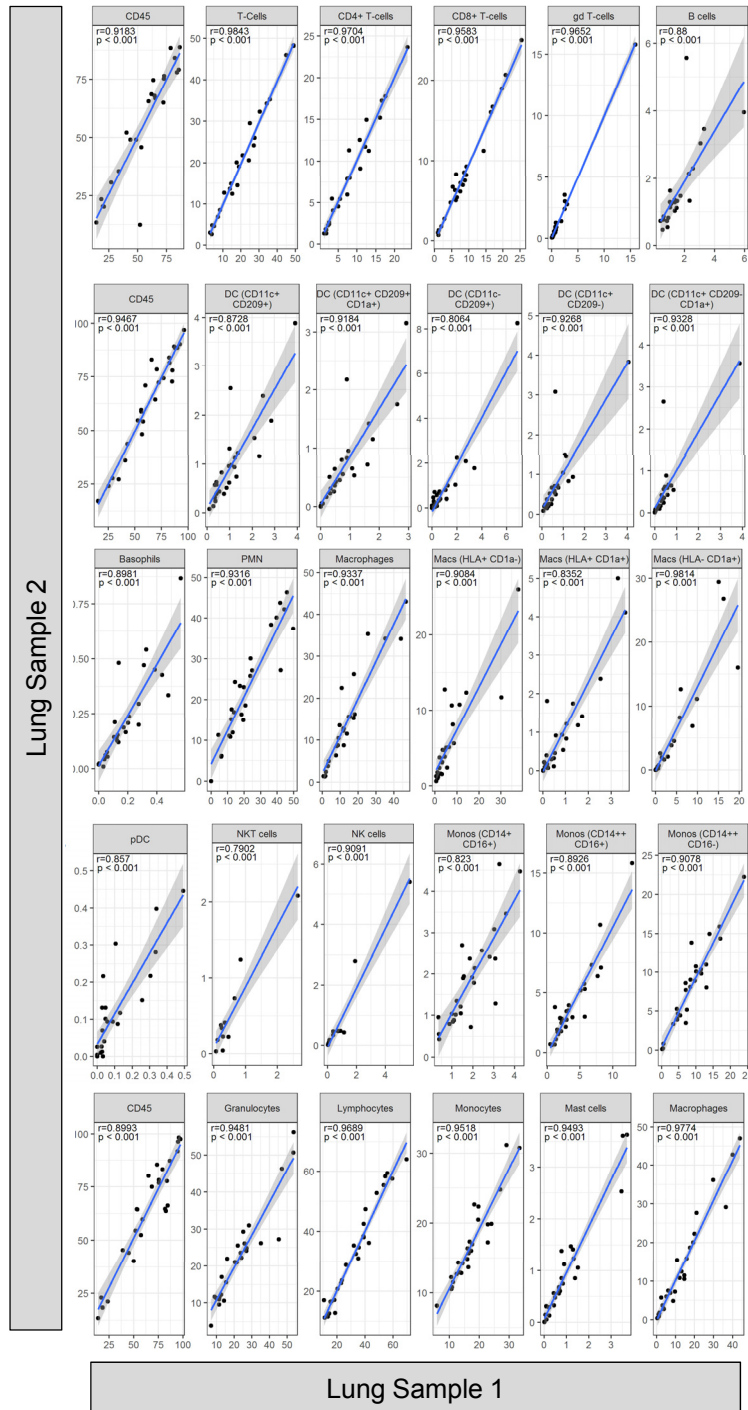

Supplement: inline-supplementary-material-5 [file inline-supplementary-material-5.pdf]

**Fig. S5**

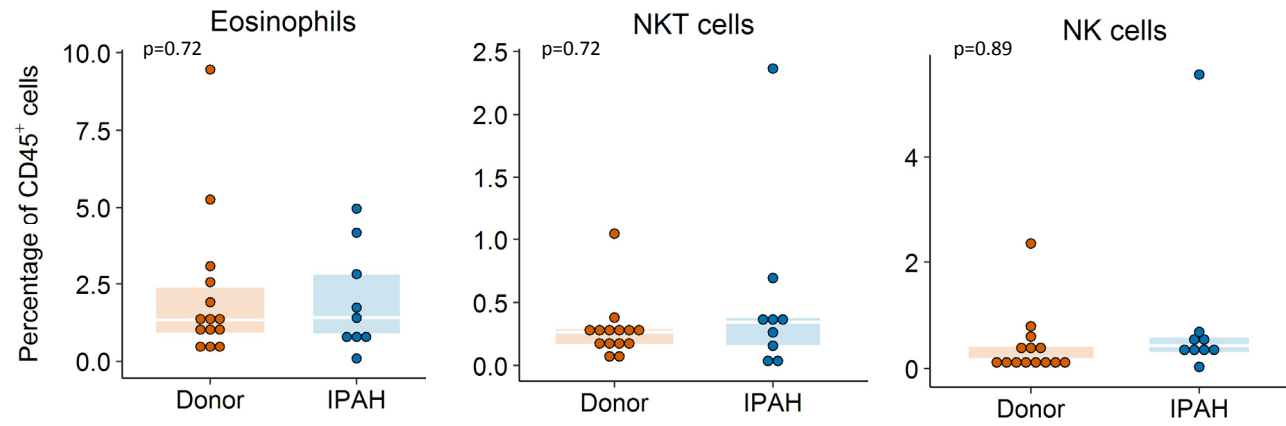

Supplement: inline-supplementary-material-6 [file inline-supplementary-material-6.pdf]
